# Supplementary material
Source: PubMed Central journal article supplement (PMC7508617)

**TABLE S1** Primers used for PCR and sequencing of the target genes.

| Oligo Name         | Sequence            | Target gene/Purpose                | PCR product sizes | PCR program                                                                    | Reference  |
|--------------------|---------------------|------------------------------------|-------------------|--------------------------------------------------------------------------------|------------|
| Cp-ERG11-Fexternal | AACAAAGATCATACGACTG | <i>CpERG11</i> /PCR and sequencing | 1805bps           | 5min 95°C, 35 cycles of [30sec, 95°C; 30sec, 52°C; and 2min, 72°C], 8min, 72°C | This study |
| Cp-ERG11-R1        | TAGTCAAATGTTGATAGG  | <i>CpERG11</i> /sequencing         | ---               |                                                                                | This study |
| Cp-ERG11-F1        | AAGGGTCATGAATTTGTG  | <i>CpERG11</i> /sequencing         | ---               |                                                                                | This study |
| Cp-ERG11-R2        | GAGGTAATGGCAAGTGTG  | <i>CpERG11</i> /sequencing         | ---               |                                                                                | This study |
| Cp-ERG11-F2        | AGGAGAAGCAATGAGGAA  | <i>CpERG11</i> /sequencing         | ---               |                                                                                | This study |
| Cp-ERG11-R3        | TTGTATGAGCATAACCTG  | <i>CpERG11</i> /sequencing         | ---               |                                                                                | This study |
| Cp-ERG11-F3        | CCATTACATTCCATATTCA | <i>CpERG11</i> /sequencing         | ---               |                                                                                | This study |
| Cp-ERG11-Rexternal | CATTCTGCATTAAACCCC  | <i>CpERG11</i> /PCR and sequencing | 1805bps           |                                                                                | This study |
| Cp-TAC1-Fexternal  | GTCCAACCTTAGCTTCTT  | <i>CpTAC1</i> /PCR and sequencing  | 3096ps            | 5min 95°C, 35 cycles of [30sec, 95°C; 30sec, 52°C; and 3min, 72°C], 8min, 72°C | This study |
| Cp-TAC1--R1        | TCCTTCTTCTCGTGAC    | <i>CpTAC1</i> /sequencing          | ---               |                                                                                | This study |
| Cp-TAC1-F1         | CATGGATATAGATTCGC   | <i>CpTAC1</i> /sequencing          | ---               |                                                                                | This study |
| Cp-TAC1-R2         | TAGAGTCACAATAGGAAA  | <i>CpTAC1</i> /sequencing          | ---               |                                                                                | This study |
| Cp-TAC1-F2         | GCAAAGTTAAATCACTTG  | <i>CpTAC1</i> /sequencing          | ---               |                                                                                |            |
| Cp-TAC1-R3         | CTTCAGGTCAATAAAAATG | <i>CpTAC1</i> /sequencing          | ---               |                                                                                |            |
| Cp-TAC1-F4         | CATATCAGTTGTACAGAA  | <i>CpTAC1</i> /sequencing          | ---               |                                                                                |            |
| Cp-TAC1-F3         | CTACGTGACTTTGATGC   | <i>CpTAC1</i> /sequencing          | ---               |                                                                                | This study |
| Cp-TAC1-R4         | TTCTTGGTACAATTCGG   | <i>CpTAC1</i> /sequencing          | ---               |                                                                                |            |
| Cp-TAC1-Rexternal  | TCTCTAAAATACAGCTCTC | <i>CpTAC1</i> /PCR and sequencing  | 3096bps           |                                                                                | This study |
| Cp-MRR1-Fexternal  | CTGTATGGAGAGTGAGAT  | <i>CpMRR1</i> /PCR and sequencing  | 3850bps           | 5min 95°C, 35 cycles of [30sec, 95°C; 30sec, 52°C; and 4min, 72°C], 8min, 72°C | This study |
| Cp-MRR1-F1         | AAACTGTGTAAAGGCTA   | <i>CpMRR1</i> /sequencing          | ---               |                                                                                | This study |
| Cp-MRR1-F2         | AATTTATCAAACACGAGA  | <i>CpMRR1</i> /sequencing          | ---               |                                                                                | This study |
| Cp-MRR1-F3         | AGAAGAGTTTATCGAGTG  | <i>CpMRR1</i> /sequencing          | ---               |                                                                                | This study |

|                   |                      |                                   |         |                                                       |            |
|-------------------|----------------------|-----------------------------------|---------|-------------------------------------------------------|------------|
| Cp-MRR1-F4        | TTTATCAGCGTTGGTTG    | <i>CpMRR1</i> /sequencing         | ---     |                                                       | This study |
| Cp-MRR1-F5        | TTGACGTATTTTACTTG    | <i>CpMRR1</i> /sequencing         | ---     |                                                       | This study |
| Cp-MRR1-F6        | GGTCAATTTGTGTGAAG    | <i>CpMRR1</i> /sequencing         | ---     |                                                       | This study |
| Cp-MRR1-Rexternal | GTTACAGGTGTATAGTGG   | <i>CpMRR1</i> /PCR and sequencing | 3850bps |                                                       | This study |
| Cp-MRR1-R1        | GAATTTCTGTCTCTGATT   | <i>CpMRR1</i> /sequencing         | ---     |                                                       | This study |
| Cp-MRR1-R2        | ATTTGTCCTTGAATCAG    | <i>CpMRR1</i> /sequencing         | ---     |                                                       | This study |
| Cp-MRR1-R3        | CAAGTCTAGTCTTTTCTC   | <i>CpMRR1</i> /sequencing         | ---     |                                                       | This study |
| Cp-MRR1-R4        | TCTTTCTCTTATCTGTT    | <i>CpMRR1</i> /sequencing         | ---     |                                                       | This study |
| Cp-MRR1-R5        | GATAAACATATCACAAATCA | <i>CpMRR1</i> /sequencing         | ---     |                                                       | This study |
| Cp-MRR1-R6        | TATCCTTTGATGTCGATG   | <i>CpMRR1</i> /sequencing         | ---     |                                                       | This study |
| Cp-UPC2-Fexternal | AGAGTGAGAGACAGTATC   | <i>CpUPC2</i> /PCR and sequencing | 2750bps | 5min 95°C,35 cycles of [                              | This study |
| Cp-UPC2-R1        | TACCGAACTGTCCAAAC    | <i>CpUPC2</i> /sequencing         | ---     | 30sec, 95°C; 30sec, 52°C; and 3min, 72°C], 8min, 72°C | This study |
| Cp-UPC2-F1        | GATCTTTGGATGGGTTG    | <i>CpUPC2</i> /sequencing         | ---     |                                                       | This study |
| Cp-UPC2-R2        | TGTTGCTGTTGTTGTTGA   | <i>CpUPC2</i> /sequencing         | ---     |                                                       | This study |
| Cp-UPC2-F2        | CGAGACCAATTGAATATG   | <i>CpUPC2</i> /sequencing         | ---     |                                                       | This study |
| Cp-UPC2-R3        | TGTTGCTGCACCTTTTAC   | <i>CpUPC2</i> /sequencing         | ---     |                                                       | This study |
| Cp-UPC2-F3        | GATTATGGACTCATTGGC   | <i>CpUPC2</i> /sequencing         | ---     |                                                       | This study |
| Cp-UPC2-R4        | AAATCCATCATCATATGC   | <i>CpUPC2</i> /sequencing         | ---     |                                                       | This study |
| Cp-UPC2-Rexternal | TTCAGTTGAAATCTCCTTC  | <i>CpUPC2</i> /PCR and sequencing | 2750bps |                                                       | This study |

**TABLE S2** Results of the comparative biofilm production assay for selected isolates.

The data are expressed as the mean  $\pm$  standard deviation for crystal violet and resazurin-based viability staining ( $n = 12$  wells).

| Starin # | Erg11p                 | AVG CTB  | AVG CV   | SD CTB   | SD CV    |
|----------|------------------------|----------|----------|----------|----------|
| **17P    | Y132F                  | 62129,75 | 0,84975  | 7392,21  | 0,152901 |
| **19P    | Y132F                  | 47658,5  | 0,563167 | 16486,37 | 0,106059 |
| **2P     | Y132F                  | 72496    | 0,911167 | 11591,54 | 0,11853  |
| **3P     | Y132F                  | 68093,83 | 0,904583 | 9833,773 | 0,124455 |
| **30P    | Y132F                  | 220660,8 | 6,682    | 10473,24 | 0,114979 |
| **45P    | Y132F                  | 46916,25 | 0,569333 | 7045,647 | 0,065245 |
| **56FS   | Y132F                  | 74271,33 | 2,4625   | 10517,19 | 0,197098 |
| **67FS   | Y132F                  | 220025,2 | 2,562667 | 12514    | 0,020861 |
| **68FS   | Y132F+K143R            | 157217,6 | 1,916    | 15421,05 | 0,021894 |
| **96P    | Y132F+K143R            | 186353,4 | 3,370667 | 22637,79 | 0,079691 |
| **97FS   | Y132F                  | 179695,8 | 3,082667 | 9885,604 | 0,0251   |
| 10P      | G458S, T519A           | 233358,6 | 4,6325   | 18999,61 | 0,321584 |
| 26R      | Q250K, R398I,<br>G458S | 207154,2 | 8,824667 | 11208,06 | 0,065908 |
| 31P      | G458S                  | 242899,1 | 5,804    | 20401,04 | 0,050735 |
| 34R      | R398I                  | 154564,8 | 2,317917 | 13999,69 | 0,210447 |
| 36P      | G458S                  | 248692,6 | 5,861333 | 11939,6  | 0,116    |
| 37R      | R398I                  | 57344,92 | 0,396917 | 13438,28 | 0,122315 |
| 54R      | None                   | 178940,9 | 2,401333 | 28932,24 | 0,025882 |
| 65P      | G458S                  | 215346,3 | 3,93     | 9241,754 | 0,042824 |
| 91P      | G458S                  | 217026,8 | 5,161333 | 20360,58 | 0,100241 |

**TABLE S3** Results of the azole antifungal susceptibility assay and amino acid substitutions found in proteins implicated in azole resistance.

| Strain # | Erg11p              | Mrr1p         | Tac1p               | Upc2p       | Fluconazole (mg/L) | Voriconazole (mg/L) |
|----------|---------------------|---------------|---------------------|-------------|--------------------|---------------------|
| 1R       | Y132F, K143R        |               |                     | L38I        | >32                | 2                   |
| 21R      |                     |               | F186I               |             | 2                  | <0,03               |
| 22R      |                     |               |                     | G342S       | 16                 | <0,03               |
| 23R      |                     |               |                     |             | 4                  | <0,03               |
| 25R      | R398I               |               |                     | A793S       | 2                  | <0,03               |
| 26R      | Q250K, R398I, G458S | P295L, Q1074* | L390I               |             | 16                 | 0,25                |
| 27R      | R398I               |               |                     |             | 4                  | 0,25                |
| 28R      |                     |               | L578M               | L38I, A793S | 1                  | 0,06                |
| 30R      | Y132F, K143R        |               |                     |             | >32                | 1                   |
| 31R      | R398I               |               |                     |             | 2                  | 0,06                |
| 33R      |                     |               |                     |             | 0,5                | 0,0156              |
| 34R      | R398I               |               | G490R               |             | 32                 | 0,25                |
| 37R      | R398I               |               |                     |             | >32                | 0,5                 |
| 38R      | R398I               |               | G490R, S760R, A761G |             | 32                 | 0,5                 |
| 39R      | R398I               |               | L578M               | A793S       | 4                  | 0,125               |
| 41R      | Y132F, K143R        |               |                     | L38I        | 32                 | 0,06                |
| 42R      | R398I               |               |                     |             | 2                  | <0,03               |
| 43R      | K143R               |               |                     | L38I        | 16                 | 0,5                 |
| 44R      |                     | K606E         | E312D               |             | 2                  | 0,06                |
| 46R      |                     |               |                     | A793S       | 0,5                | 0,0156              |
| 47R      | R398I               |               |                     | Q348P       | 0,5                | <0,03               |
| 48R      | R398I               |               | N7I                 |             | 0,5                | <0,03               |
| 49R      | R398I               |               |                     |             | 0,25               | 0,0156              |
| 50R      | Y132F, K143R        |               |                     | L38I        | >32                | 1                   |
| 51R      | R398I               |               | L390I               |             | 2                  | 0,03                |
| 52R      | R398I               |               |                     |             | 2                  | 0,03                |
| 54R      |                     |               |                     |             | 32                 | 0,125               |
| 70R      |                     |               |                     | A793S       | 0,125              | <0,03               |
| 72R      |                     |               | N7I                 | L38I, A793S | 0,5                | <0,03               |
| 105R     |                     |               |                     | L38I        | 0,5                | 0,0156              |
| 127R     | R398I               |               |                     | P201S       | 2                  | <0,03               |
| 5FS      | Y132F (A395W)       |               |                     | L38I, A793S | >32                | 0,25                |
| 6FS      | Y132F, K143R        |               |                     | L38I, A793S | >32                | 1                   |
| 15FS     | Y132F, K143R        |               |                     | A793S       | >32                | 1                   |
| 56FS     | Y132F               |               |                     |             | >32                | 2                   |
| 59FS     | Y132F, K143R        |               |                     |             | >32                | 1                   |
| 62R      | R398I               |               |                     |             | 0,5                | <0,03               |
| 63R      |                     |               | L574F               |             | 0,25               | <0,03               |
| 64R      |                     |               | N7Y, A352V          | A793S       | 0,25               | <0,03               |
| 67FS     | Y132F (A395W)       |               |                     |             | 32                 | 0,5                 |

|       |               |        |              |             |       |        |
|-------|---------------|--------|--------------|-------------|-------|--------|
| 68FS  | Y132F, K143R  |        |              |             | 32    | 0,5    |
| 69FS  | Y132F, K143R  |        |              | L38I, A793S | >32   | 1      |
| 76R   |               |        |              | S577*       | 0,06  | 0,0156 |
| 94FS  | Y132F         |        |              | L38I, A793S | >32   | 0,125  |
| 97FS  | Y132F (A395W) |        |              |             | 32    | 0,5    |
| 101FS | Y132F, K143R  |        |              | L38I, A793S | >32   | 1      |
| 106FS | Y132F, K143R  |        |              | A793S       | >32   | 1      |
| 107FS | Y132F, K143R  |        | A21V         |             | >32   | 1      |
| 108FS | Y132F         |        | A21V         |             | 8     | 0,06   |
| 112FS | K143R         |        | A21V         | A793S       | >32   | 0,5    |
| 1P    |               |        | L578M, N602Y | A793S       | 0,5   | <0,03  |
| 2P    | Y132F         |        | L578M        | A793S       | 8     | 0,25   |
| 3P    | Y132F         |        | N7Y, L578M   | A793S       | 8     | 0,25   |
| 4P    |               | NA     | NA           | NA          | 0,5   | <0,03  |
| 5P    |               |        |              |             | 0,125 | <0,03  |
| 6P    | R398I         |        |              |             | 0,5   | <0,03  |
| 7P    | Y132F, K143R  | L926*  |              |             | >32   | 0,5    |
| 9P    | Y132F         |        |              | A793S       | >32   | 2      |
| 10P   | G458S, T519A  |        |              | A793S       | 16    | 0,5    |
| 15P   | Y132F         |        |              | A793S       | 8     | 0,125  |
| 16P   | R398I         |        |              |             | 2     | 0,06   |
| 17P   | Y132F         |        |              |             | 8     | 0,25   |
| 18P   | Y132F, K143R  |        |              |             | >32   | 4      |
| 19P   | Y132F         |        |              |             | 8     | 0,125  |
| 25P   | Y132F         | G427V  | P150H        |             | 8     | 0,25   |
| 30P   | Y132F         |        |              |             | 16    | 0,25   |
| 31P   | G458S         |        |              |             | >32   | 1      |
| 35P   | Y132F, G307A  |        |              |             | >32   | 2      |
| 36P   | G458S         |        |              |             | 16    | 0,5    |
| 37P   | Y132F         |        |              |             | >32   | 0,5    |
| 38P   | R398I         |        | G490R        |             | 0,06  | 0,03   |
| 40P   | Y132F         |        |              | L38I        | 16    | 0,25   |
| 41P   | Y132F         |        |              | A793S       | 8     | 0,125  |
| 42P   | Y132F         |        |              | E7*         | 8     | 0,25   |
| 43P   | Y132F, K143R  |        |              |             | >32   | 1      |
| 45P   | Y132F         |        |              |             | 8     | 0,25   |
| 47P   | Y132F         |        |              | P45H        | 8     | 0,25   |
| 49P   | Y132F, G307A  |        |              |             | >32   | 2      |
| 50P   | Y132F         |        |              | P45H, A793S | 8     | 0,125  |
| 54P   | Y132F, K143R  |        | Q965K, M966V |             | >32   | 1      |
| 55P   |               | L419F  |              |             | 8     | 0,25   |
| 59P   | Y132F         |        |              | Q372H       | 8     | 0,25   |
| 60P   | Y132F         | Q1027R | D603V, P803L |             | 8     | 0,125  |
| 65P   | G458S         |        |              | Q371H       | 16    | 0,5    |
| 75P   | Y132F         | Q1027R |              |             | 8     | 0,25   |
| 77P   | Y132F, G307A  |        |              | L38I, Q371H | 16    | 0,5    |

|     |              |       |  |      |     |       |
|-----|--------------|-------|--|------|-----|-------|
| 81P | Y132F, K143R | G472V |  |      | >32 | 0,5   |
| 87P | Y132F, K143R |       |  | P45H | >32 | 1     |
| 91P | G458S        |       |  |      | 16  | 0,5   |
| 96P | Y132F, K143R |       |  |      | >32 | 1     |
| 97P |              |       |  |      | 0,5 | <0,03 |

FIG S1. Frequency of isolation of the *C. parapsilosis* species complex per year. (A) 2007, (B) 2008, (C) 2009, (D) 2010, (E) 2011, (F) 2012, (G) 2013, (H) 2014, (I) 2015, (J) 2016, (K) 2017, (L) 2018, and (M) 2019.

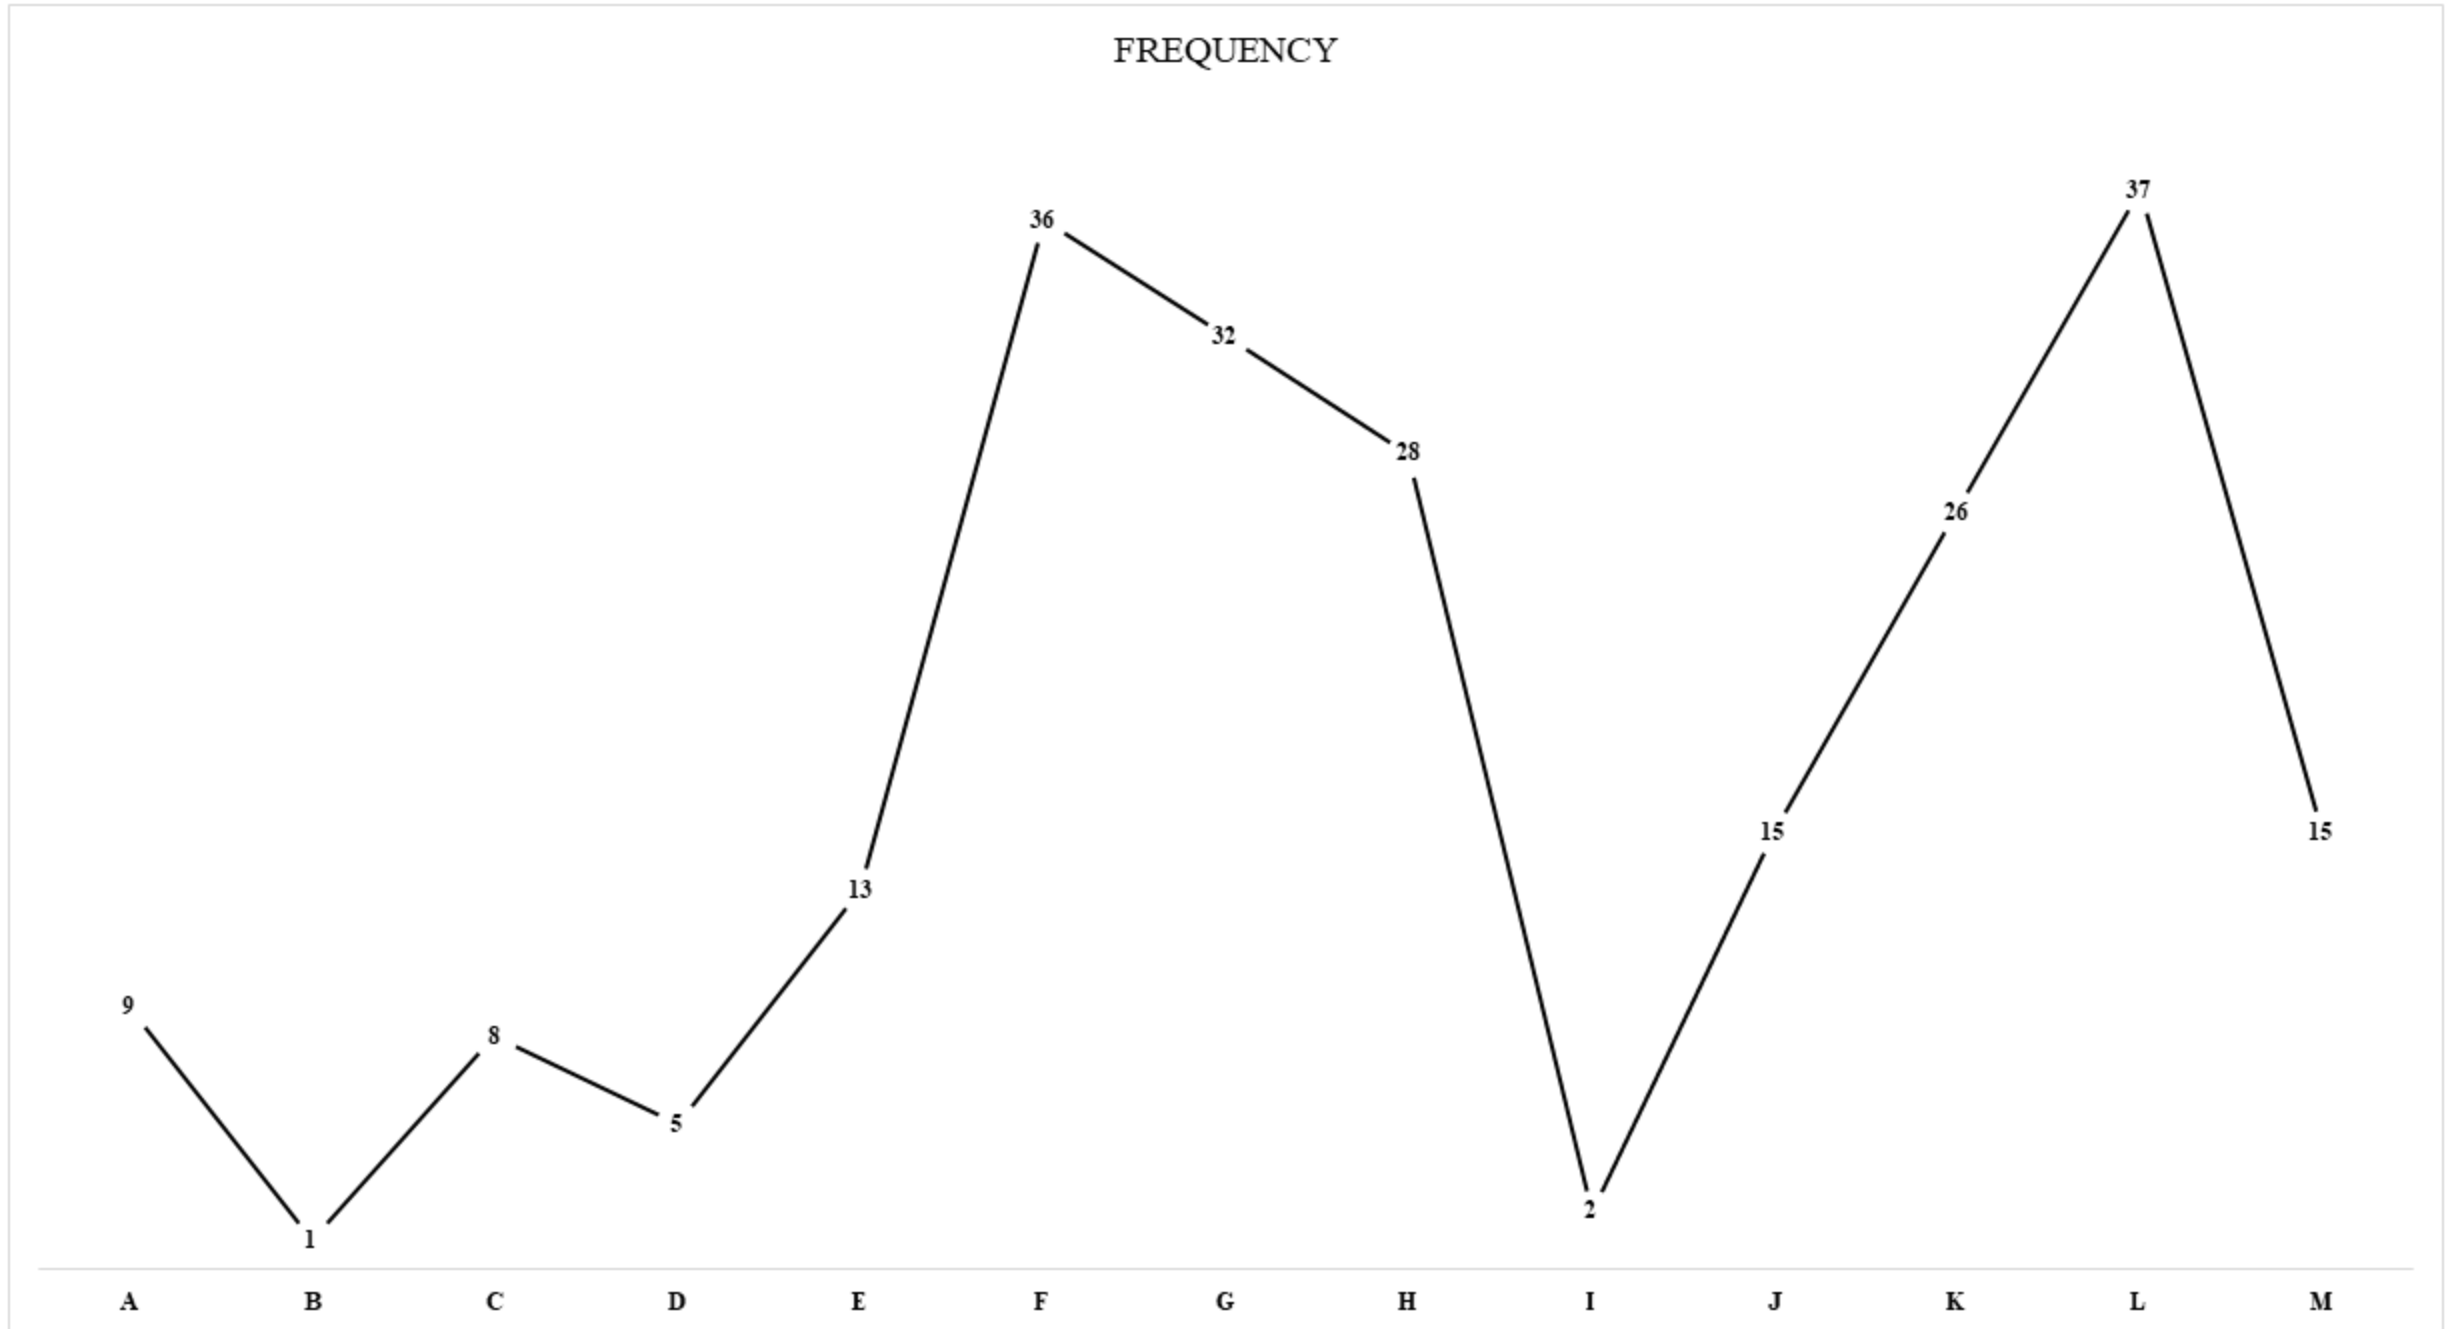

# FREQUENCY

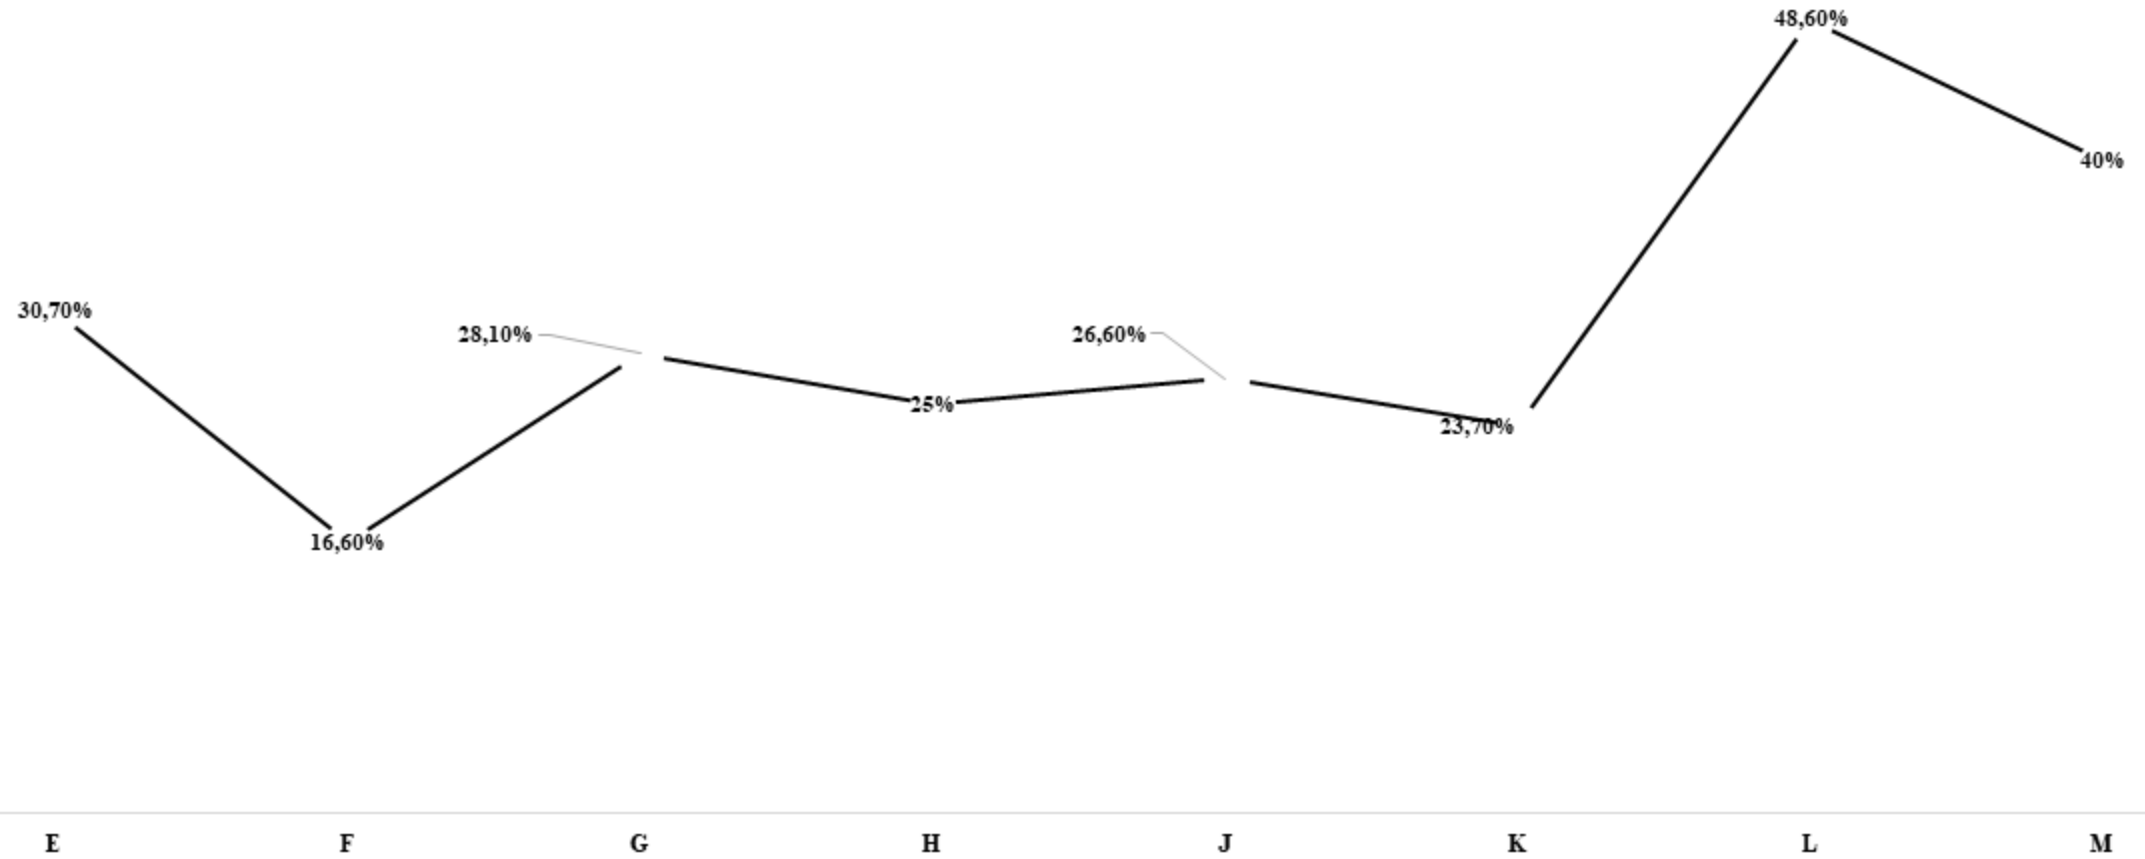

FIG S2 Dynamic frequency (percentage) of FLZR isolates in each year.



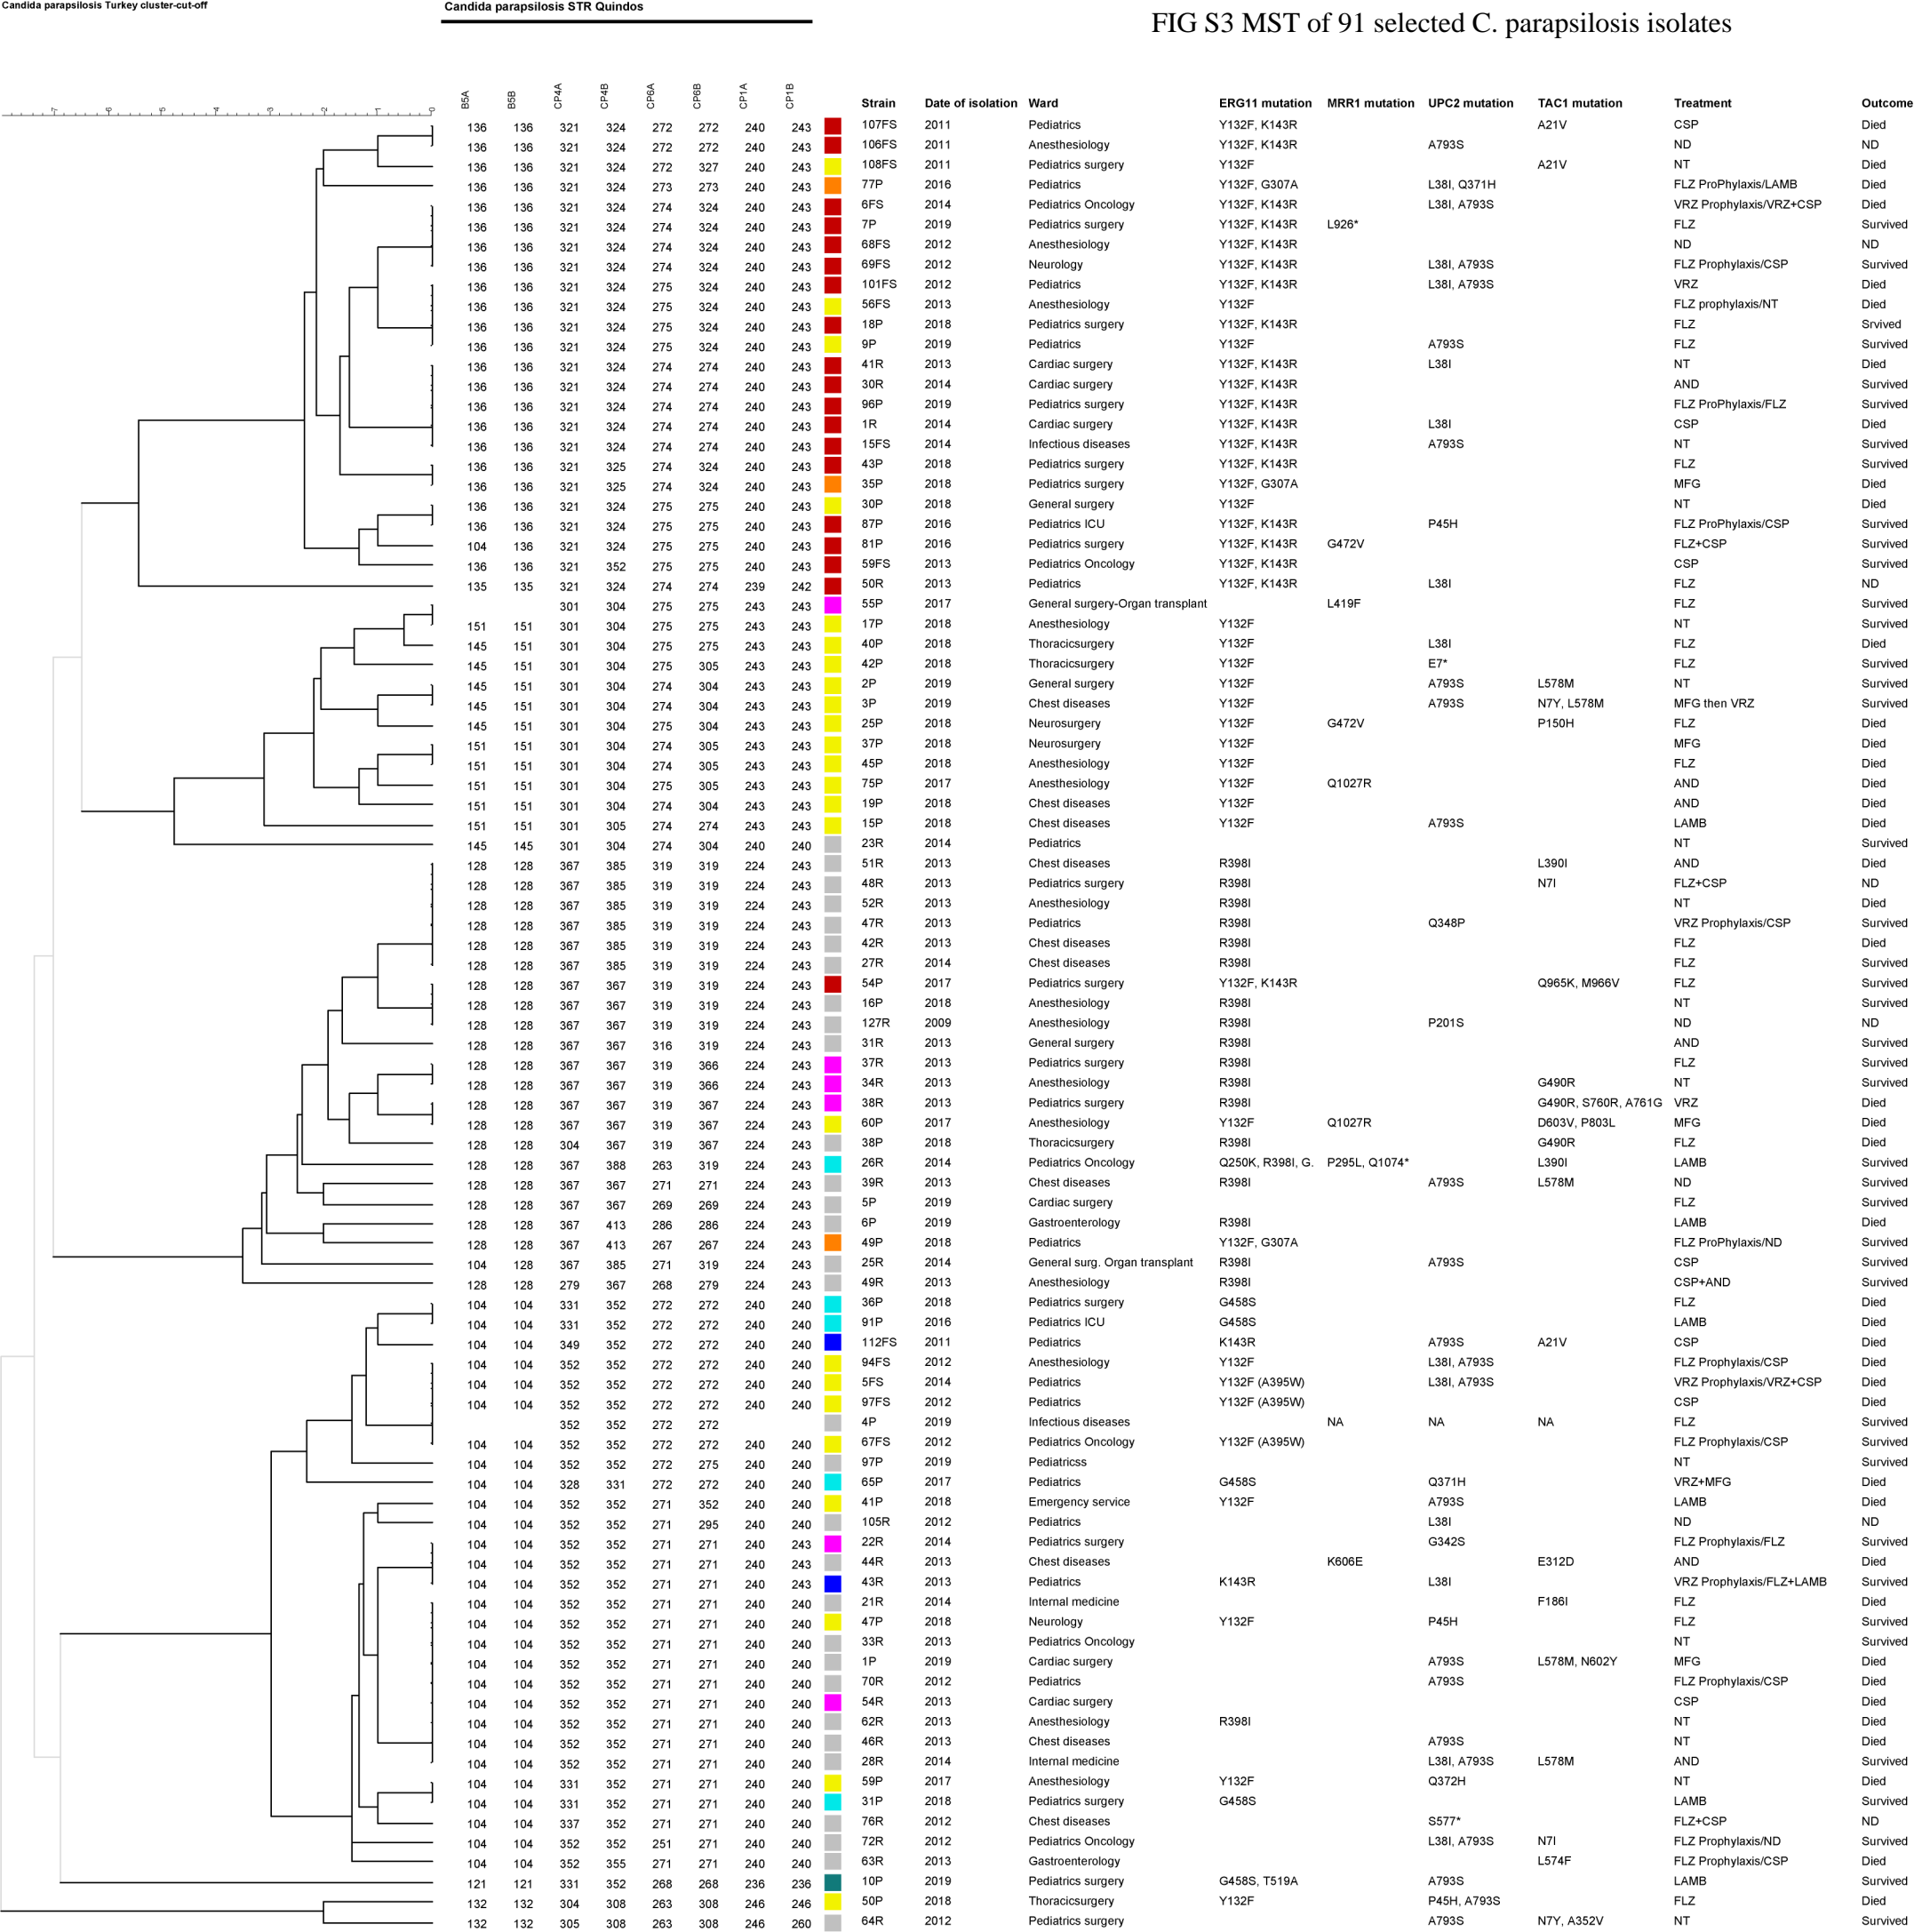





FIG S6 AFLP typing of 91 selected *C. parapsilosis* isolates

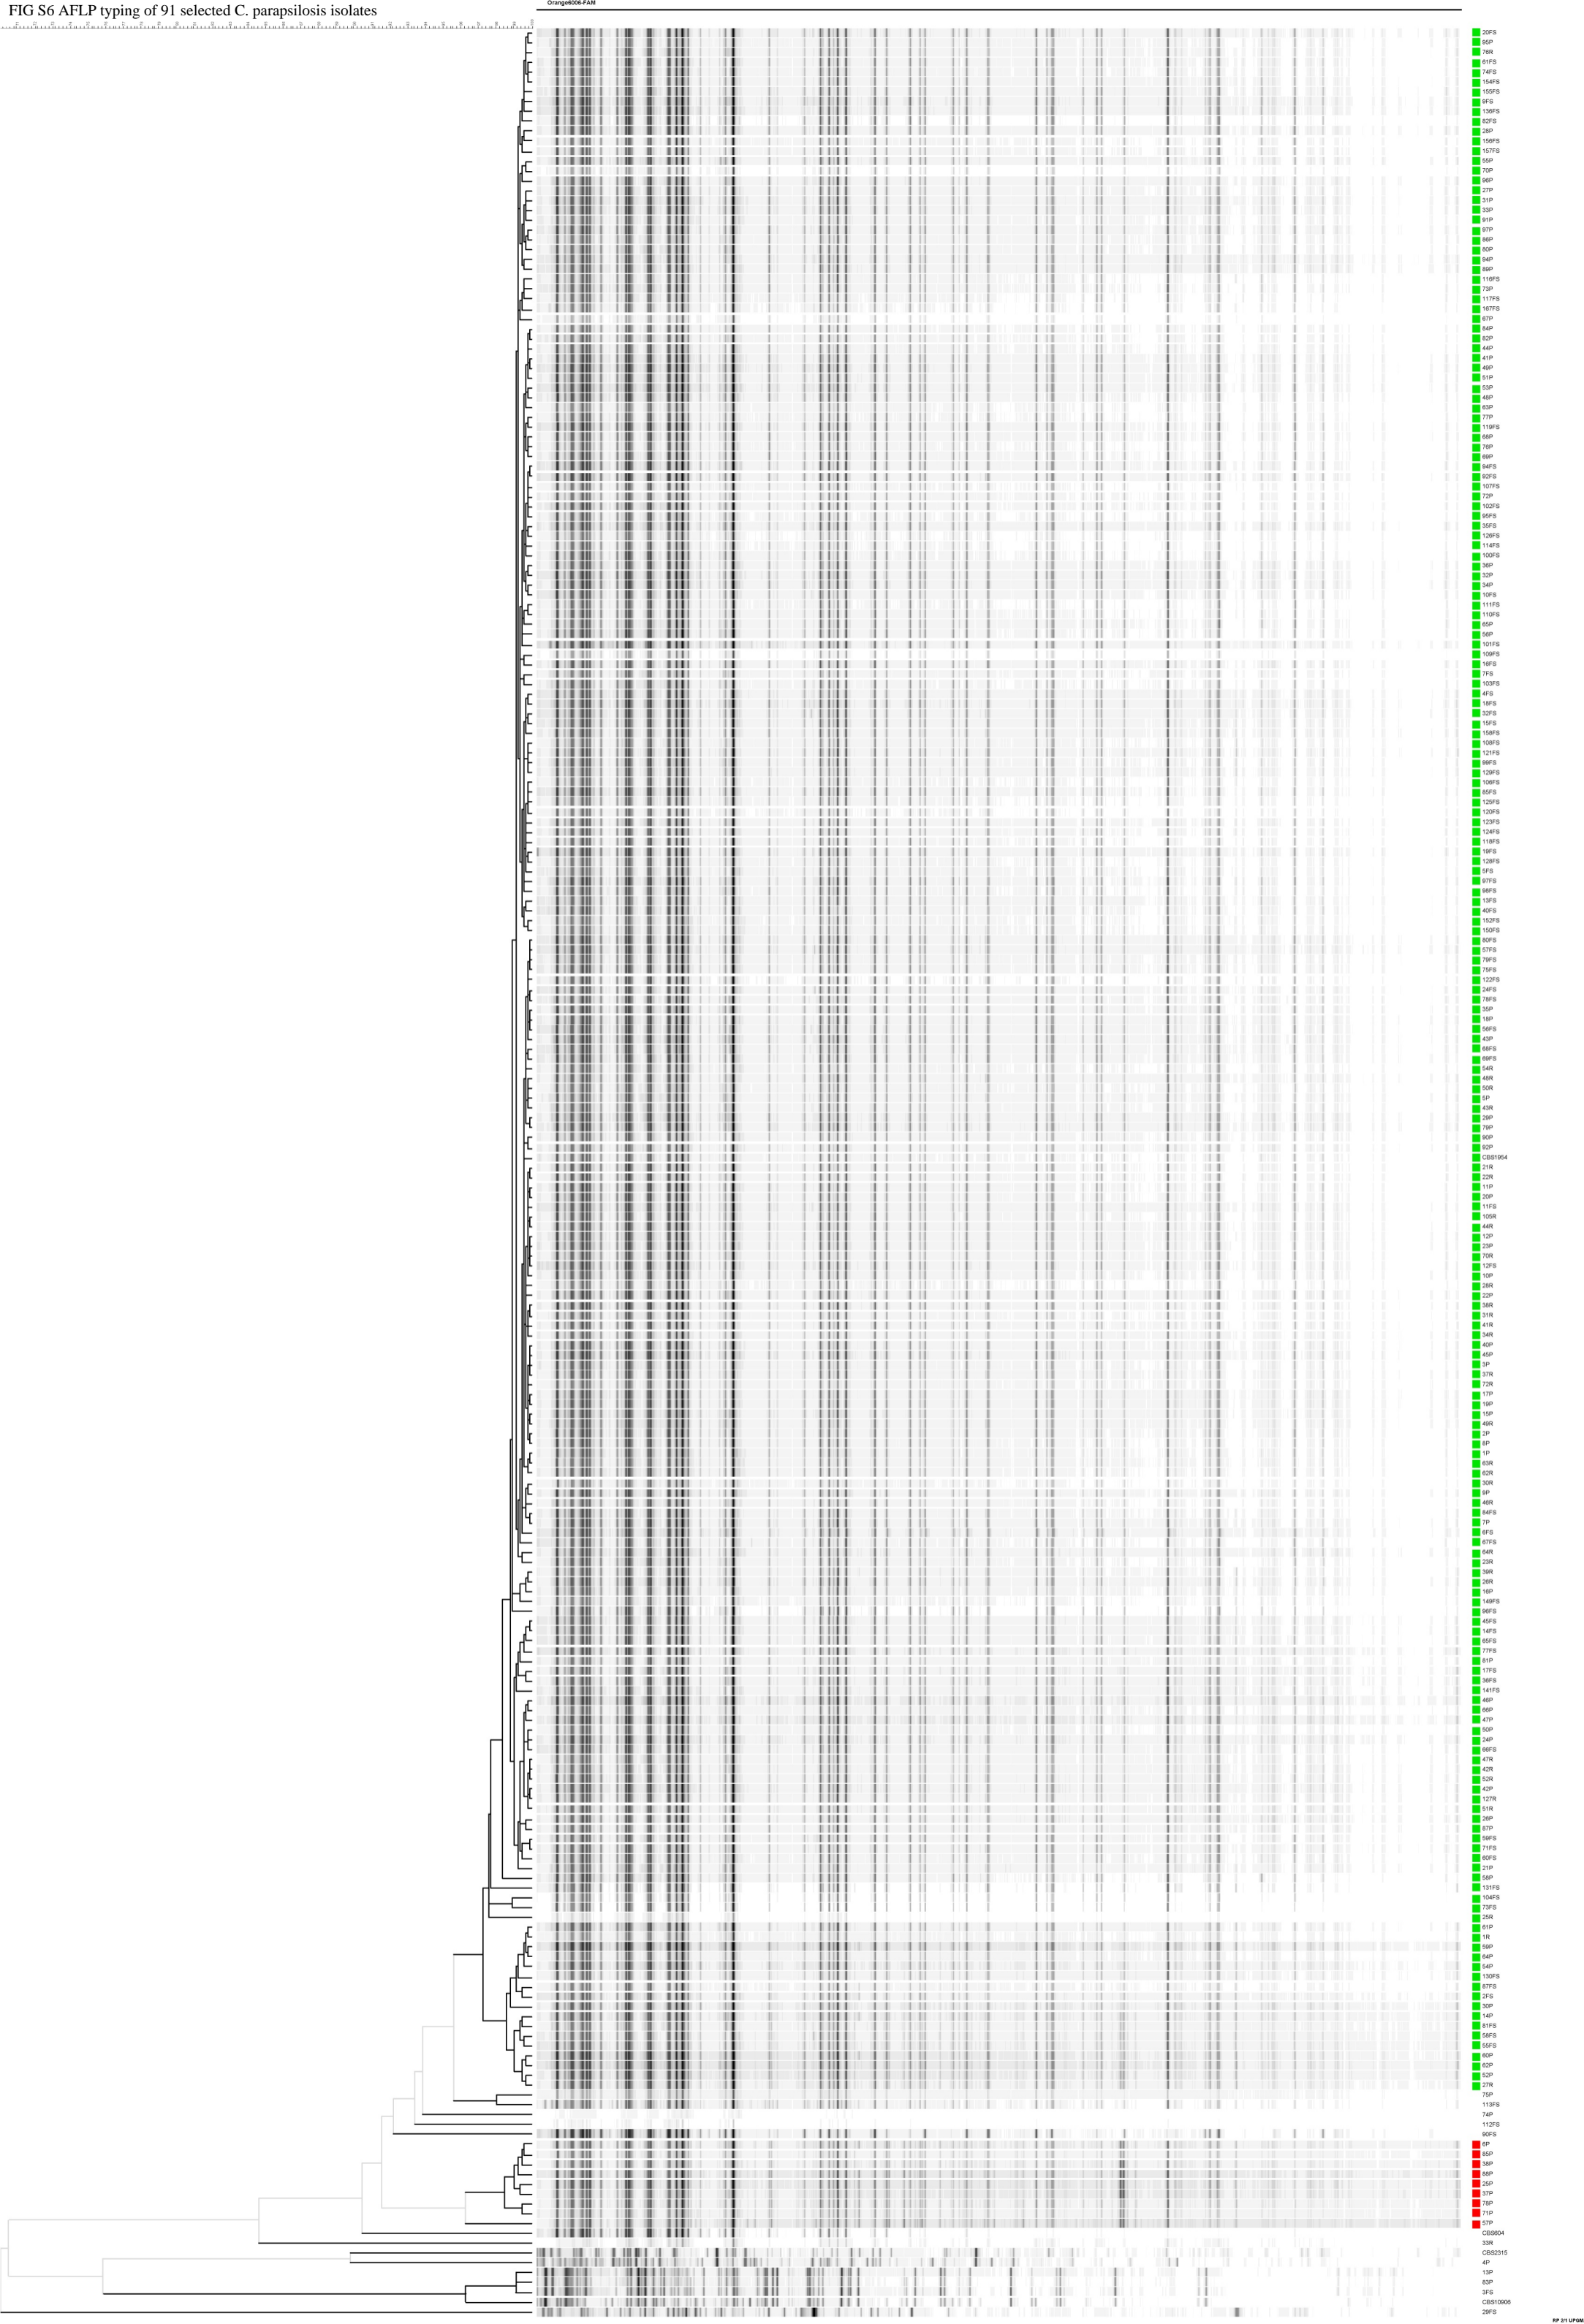

FIG S7 Biofilm formation by isolates with the Y132F mutation and other FLZR isolates. The data are expressed as the mean  $\pm$  standard deviation for crystal violet and resazurin-based viability staining (n = 12 wells).

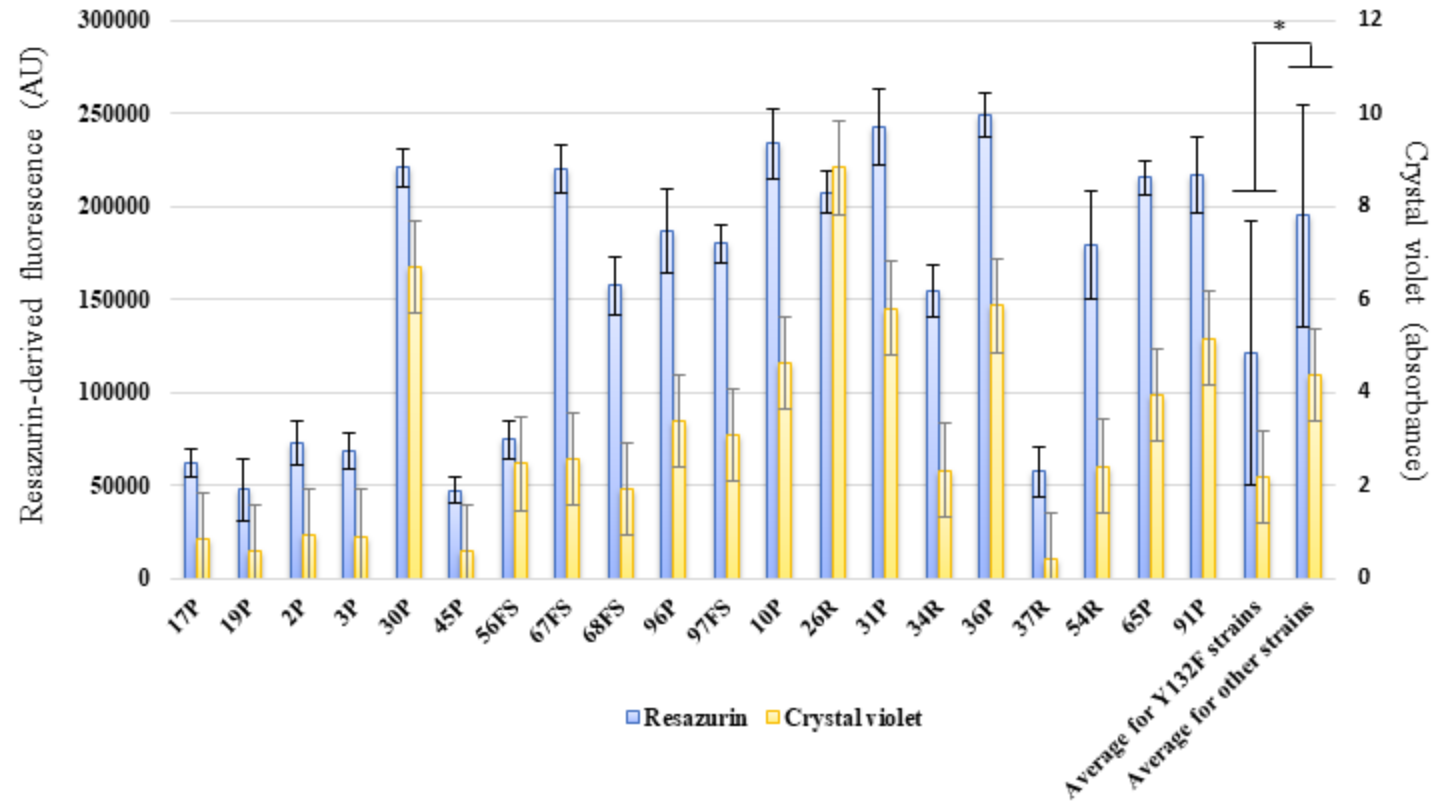

Supplement: AAC.01001-20-s0001.pdf [file AAC.01001-20-s0001.pdf]
